# Supplementary material for: RNA binding activates RIG-I by releasing an autorepressed signaling domain
Source: PubMed Central journal article supplement (PMC6774723; doi:10.1126/sciadv.aax3641), 2019-10-02
Supplement: aax3641_SM.pdf [file aax3641_SM.pdf]

## Supplementary Materials for

### RNA binding activates RIG-I by releasing an autorepressed signaling domain

T. H. Dickey, B. Song, A. M. Pyle\*

\*Corresponding author. Email: [anna.pyle@yale.edu](mailto:anna.pyle@yale.edu)

Published 2 October 2019, *Sci. Adv.* **5**, eaax3641 (2019)

DOI: 10.1126/sciadv.aax3641

#### **This PDF file includes:**

Fig. S1. Tags were placed in locations designed to facilitate labeling and avoid perturbation of RIG-I function.

Fig. S2. Controls demonstrate that dual labeling of RIG-I does not perturb its function, and FRET reports the distance between hel2i and 2CARD.

Fig. S3. pppNS ejects 2CARD at high concentrations.

Fig. S4. ADP-AIF<sub>x</sub> subtly but reproducibly increases 2CARD ejection.

Table S1. RNA sequences used in this study.

References (50, 51)

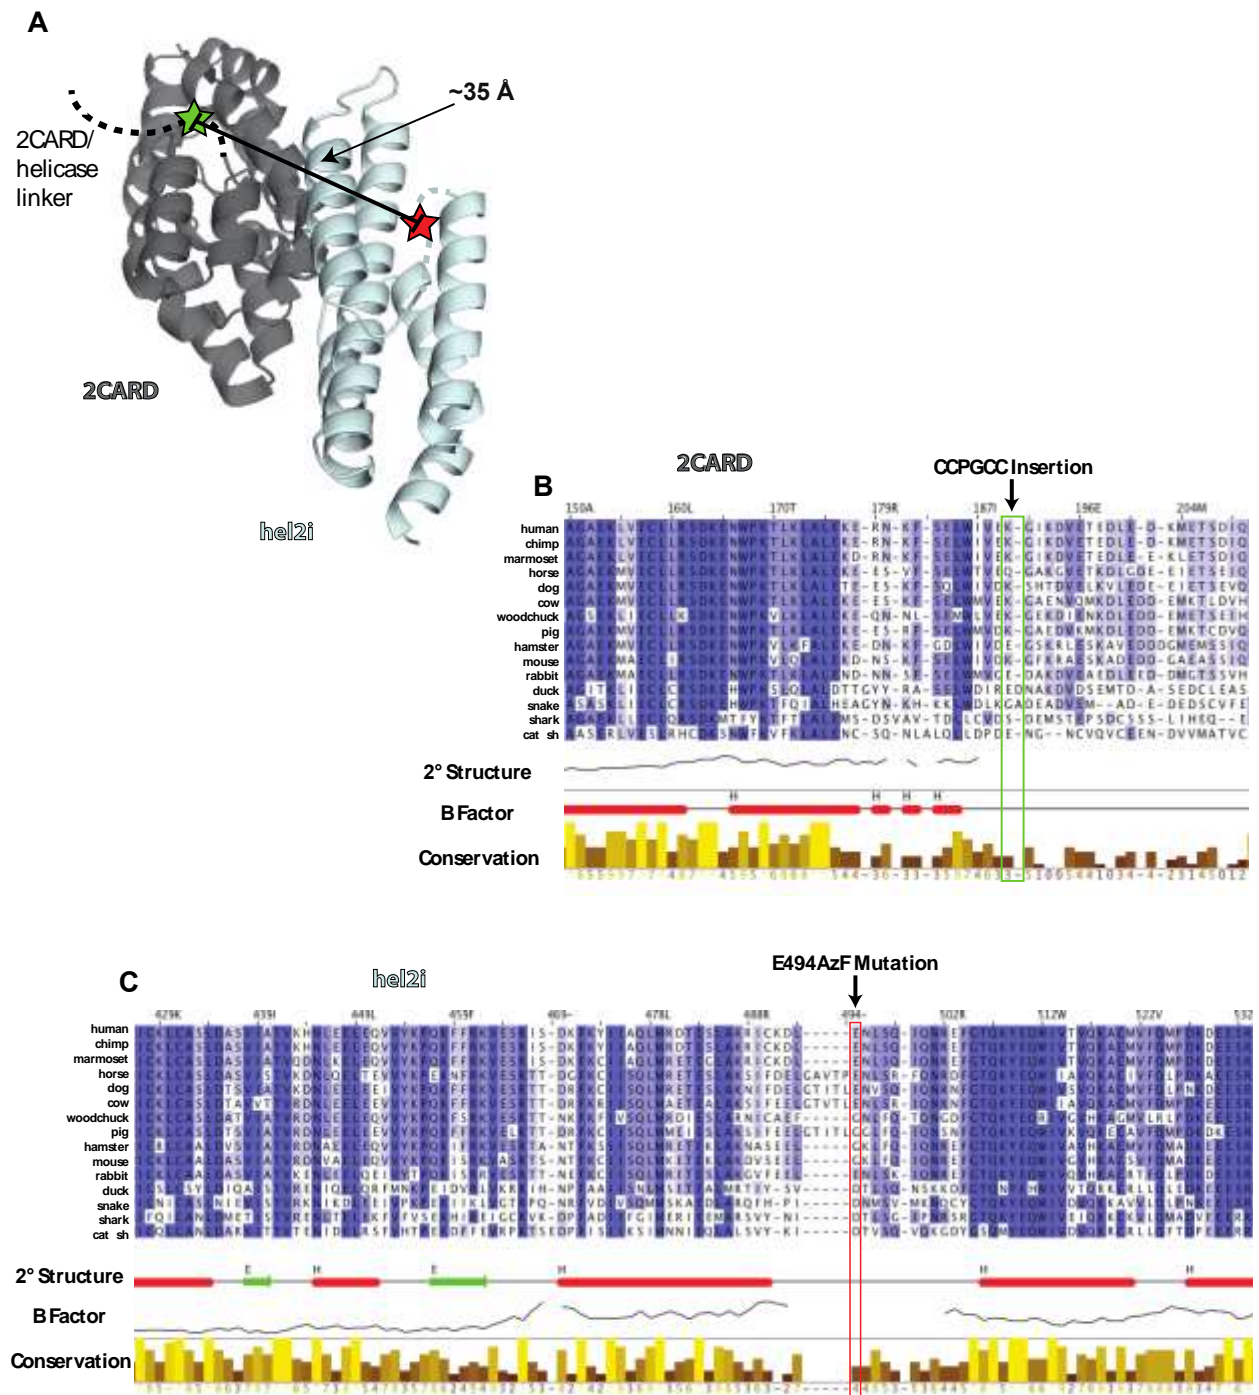

**Fig. S1. Tags were placed in locations designed to facilitate labeling and avoid perturbation of RIG-I function.** **A**) Tags were placed in regions of the 2CARD and hel2i domains that are disordered in the apo RIG-I structure (PDB: 4A2W) and predicted to be proximal. The distance between tags was estimated by identifying structures of isolated RIG-I domains (PDB:3ZD6 and PDB:2LWD) that modeled the amino acids at the locations of the tags. These structures were aligned to the structure of apo RIG-I and the distance between alpha carbons of the appropriate residues (E189 and E494 + 3.5 Å for the distance between amino acids 189 and 190) is reported. **B** and **C**) Tags were placed at evolutionarily divergent regions of RIG-I. Select sequences were aligned using the T-Coffee method in Jalview (50, 51). Coloring indicates the level of conservation and secondary structures and B factors derive from the apo RIG-I structure.

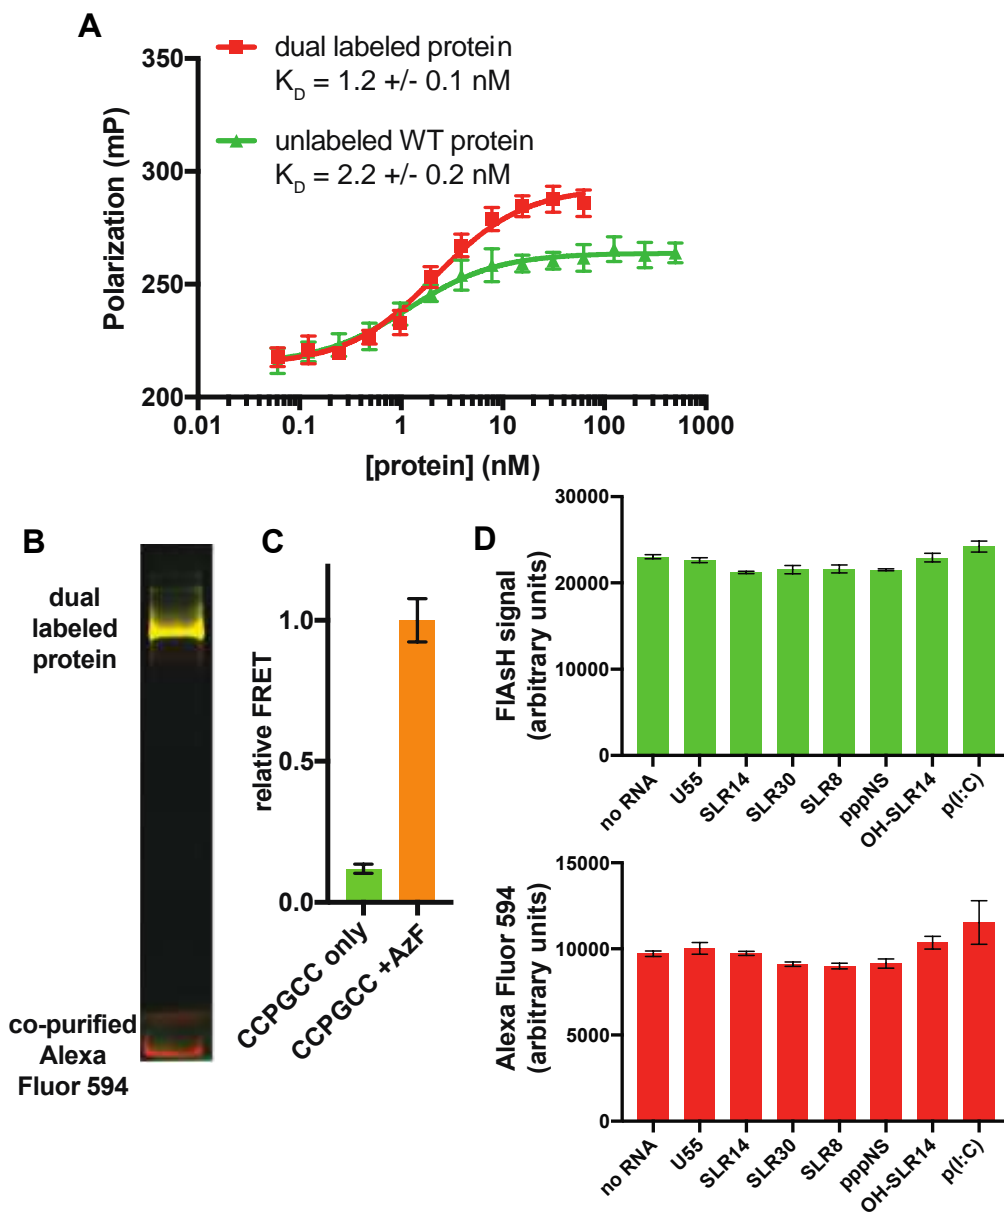

**Fig. S2. Controls demonstrate that dual labeling of RIG-I does not perturb its function, and FRET reports the distance between hel2i and 2CARD.** **A)** Dual-labeled RIG-I binds RNA with a similar affinity to un-tagged RIG-I. RNA binding activity was measured by fluorescence anisotropy using OH-SLR10 RNA. **B)** Free Alexa Fluor 594 co-purifies with dual-labeled RIG-I. Dual-labeled protein was purified by desalting column and analyzed by SDS-PAGE, revealing the presence of Alexa Fluor 594 that is not covalently bound to RIG-I. **C)** Non-covalently bound Alexa Fluor 594 does not contribute to the FRET signal. Without the AzF tag, Alexa Fluor is not covalently bound and exhibits little to no FRET signal. **D)** Changes in FRET are not due to artifacts of fluorescent quenching or enhancement upon RNA binding. Single-labeled proteins exhibit no significant change in fluorescence upon binding RNA, suggesting that FRET changes reflect a change in distance between fluorophores.

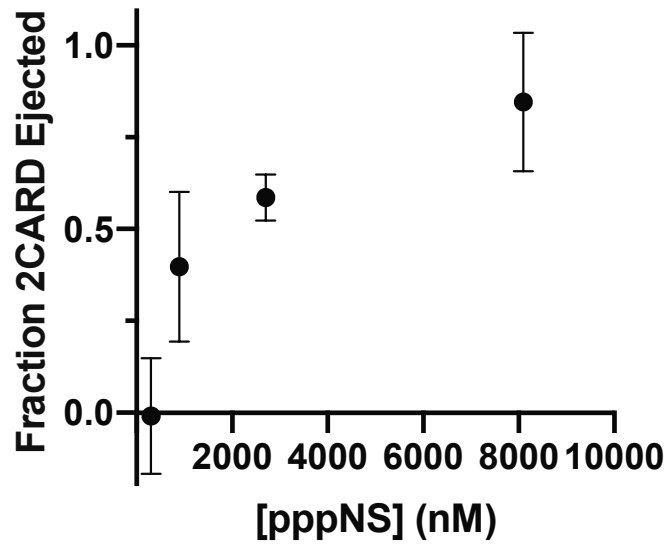

**Fig. S3. pppNS ejects 2CARD at high concentrations.** pppNS ejects 2CARD when bound at very high concentrations. This suggests that the structural requirements for 2CARD ejection are lax and that low concentrations of protein/RNA are required to discriminate between low- and high-quality RIG-I ligands. The fraction of 2CARD ejected was calculated by dividing the normalized FRET signal for each pppNS data point by a fully-ejected control sample bound to SLR14.

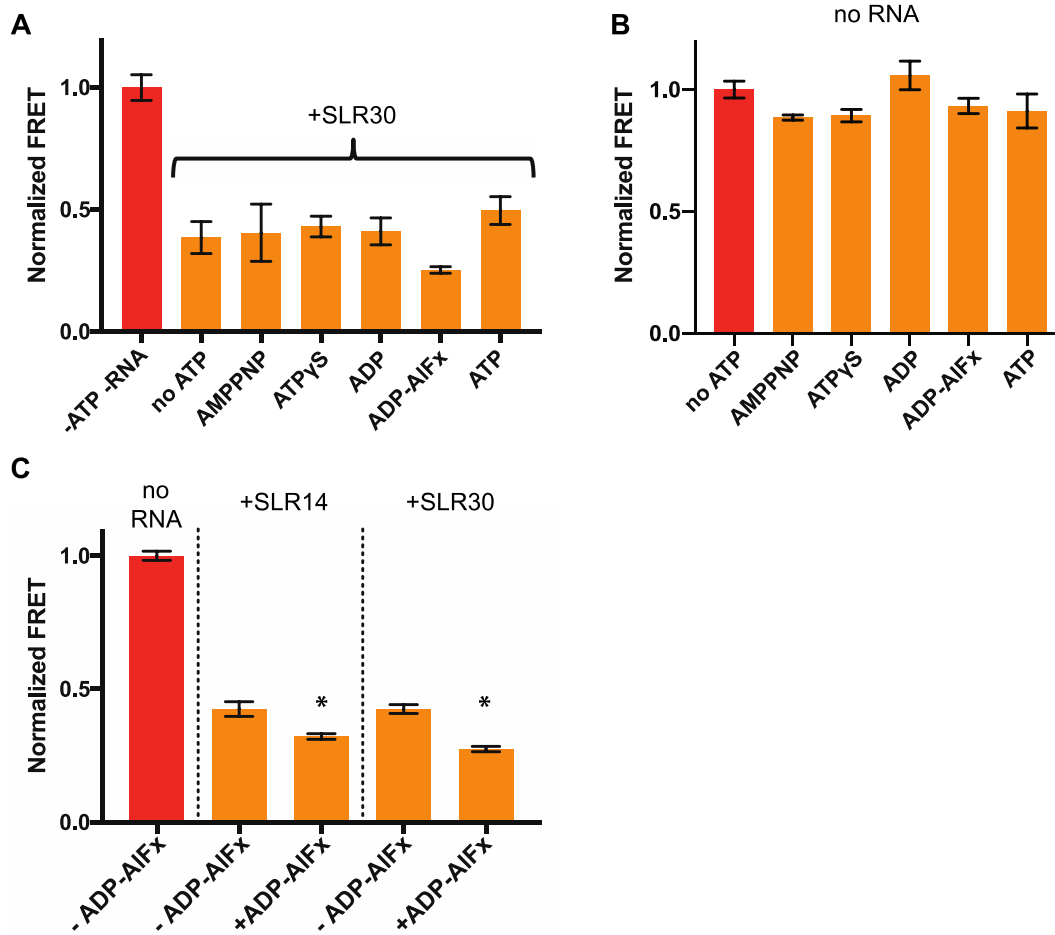

**Fig. S4. ADP-AIF<sub>x</sub> subtly but reproducibly increases 2CARD ejection.** A) Like SLR14, most ATP analogs have little effect on RIG-I bound to SLR30 B) and in the absence of RNA. C) Re-measuring the effect of ADP-AIF<sub>x</sub> with a greater number of replicates reveals a significant decrease in FRET for RIG-I bound to both SLR14 (unpaired t-test;  $t(10)=3.516$ , \* =  $p = 0.0056$ ) and SLR30 (unpaired t-test;  $t(10)=7.685$ , \* =  $p < 0.0001$ ).

**Table S1. RNA sequences used in this study.**

|                |                                                                                                                                                                                                                                                         |
|----------------|---------------------------------------------------------------------------------------------------------------------------------------------------------------------------------------------------------------------------------------------------------|
| SLR10          | $\begin{array}{c} 5' \textit{ppp}\text{-GGACGUACGU} \begin{array}{c} \text{U} \\ \text{U} \end{array} \\ \text{     } \\ 3' \text{OH-CCUGCAUGCA} \begin{array}{c} \text{C} \\ \text{G} \end{array} \end{array}$                                         |
| OH-SLR14       | $\begin{array}{c} 5' \text{OH-GGAUCGAUCGAUCG} \begin{array}{c} \text{U} \\ \text{U} \end{array} \\ \text{     } \\ 3' \text{OH-CCUAGCUAGCUAGC} \begin{array}{c} \text{C} \\ \text{G} \end{array} \end{array}$                                           |
| SLR14          | $\begin{array}{c} 5' \textit{ppp}\text{-GGAUCGAUCGAUCG} \begin{array}{c} \text{U} \\ \text{U} \end{array} \\ \text{     } \\ 3' \text{OH-CCUAGCUAGCUAGC} \begin{array}{c} \text{C} \\ \text{G} \end{array} \end{array}$                                 |
| SLR30          | $\begin{array}{c} 5' \textit{ppp}\text{-GGAUCGAUCGAUCGAUCGGCAUCGAUCGGC} \begin{array}{c} \text{U} \\ \text{U} \end{array} \\ \text{     } \\ 3' \text{OH-CCUAGCUAGCUAGCUAGCCGUAGCUAGCCG} \begin{array}{c} \text{C} \\ \text{G} \end{array} \end{array}$ |
| SLR8           | $\begin{array}{c} 5' \textit{ppp}\text{-GGCGCGGG} \begin{array}{c} \text{U} \\ \text{U} \end{array} \\ \text{     } \\ 3' \text{OH-CCGCGCCC} \begin{array}{c} \text{C} \\ \text{G} \end{array} \end{array}$                                             |
| pppNS          | $5' \textit{ppp}\text{-GAAGCAAUCUCCACUUACUAGAAA-OH} 3'$                                                                                                                                                                                                 |
| U55            | $5' \text{OH-U}_{55}\text{-OH } 3'$                                                                                                                                                                                                                     |
| OH-SLR10-AF488 | $\begin{array}{c} 5' \text{OH-GGACGUACGU} \begin{array}{c} \text{U} \\ \text{U}^{\text{AF488}} \end{array} \\ \text{     } \\ 3' \text{OH-CCUGCAUGCA} \begin{array}{c} \text{C} \\ \text{G} \end{array} \end{array}$                                    |
